# Supplementary material
Source: ML conference proceedings conference paper supplement (https://openaccess.thecvf.com/content/CVPR2021/html/Yang_Towards_Improving_the_CVPR_2021_paper.html)
Supplement: Supplementary file 1 [file Yang_Towards_Improving_the_CVPR_2021_supplemental.zip]

Archive with 2 entries (2 files):
- Search_Process_of_EnTranNAS-DST.mp4
- 07833-supp.pdf
